# Supplementary material for: Second booster dose improves antibody neutralization against BA.1, BA.5 and BQ.1.1 in individuals previously immunized with CoronaVac plus BNT162B2 booster protocol
Source: PubMed Central journal article supplement (PMC11024236; doi:10.3389/fcimb.2024.1371695), 2024-04-04
Supplement: DataSheet_1.pdf [file DataSheet_1.pdf]

| 9 months after primary protocol |            |          |           |          |
|---------------------------------|------------|----------|-----------|----------|
|                                 | No Booster |          | 1 Booster |          |
|                                 | Mean       | SD       | Mean      | SD       |
| <b>BA.1</b>                     | 133,1873   | 249,7663 | 663,3862  | 997,494  |
| <b>BQ.1.1</b>                   | 132,446    | 248,8192 | 199,0308  | 362,4621 |
| <b>BA.5</b>                     | 63,21067   | 97,05909 | 100,2962  | 146,3179 |

| 12 months after primary protocol |            |          |           |          |            |          |
|----------------------------------|------------|----------|-----------|----------|------------|----------|
|                                  | No Booster |          | 1 Booster |          | 2 Boosters |          |
|                                  | Mean       | SD       | Mean      | SD       | Mean       | SD       |
| <b>BA.1</b>                      | 1292,318   | 1753,456 | 1048,097  | 2280,32  | 949,1737   | 1110,99  |
| <b>BQ.1.1</b>                    | 453,0095   | 1002,356 | 673,7837  | 895,0462 | 418,2942   | 528,1699 |
| <b>BA.5</b>                      | 402,2465   | 531,3225 | 345,8817  | 364,0141 | 360,7611   | 431,193  |

| 12 months after primary protocol |            |          |           |          |            |          |
|----------------------------------|------------|----------|-----------|----------|------------|----------|
|                                  | No Booster |          | 1 Booster |          | 2 Boosters |          |
|                                  | Mean       | SD       | Mean      | SD       | Mean       | SD       |
| <b>BA.1</b>                      | 1881,425   | 2134,922 | 1402,498  | 2670,038 | 2361,5     | 1922,286 |
| <b>BQ.1.1</b>                    | 538,7318   | 817,4712 | 799,5432  | 2597,871 | 726,077    | 1081,959 |
| <b>BA.5</b>                      | 128,4782   | 199,0219 | 311,9942  | 554,4435 | 659,1805   | 1064,767 |

**Supplementary Table 1.** VNT<sub>50</sub> means and standard deviations against SARS-CoV-2 subvariants, for each vaccination and collection time point groups.
